# Supplementary figures and images for: Biochemical Signatures of Doppel Protein in Human Astrocytomas to Support Prediction in Tumor Malignancy
Source: Hindawi journal article supplement (doi:10.1155/2010/301067), 2010-01-01

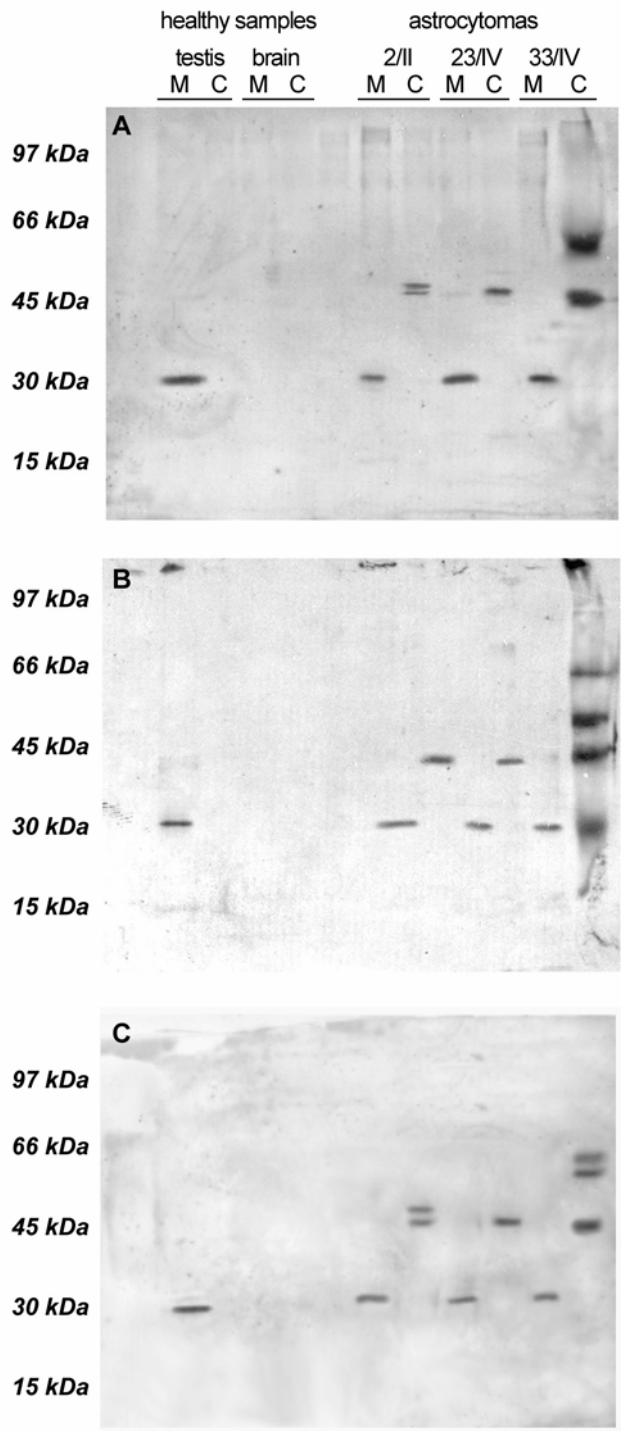

Supplement: f2 [file 301067.f2.pdf]
